# Supplementary material
Source: PubMed Central journal article supplement (PMC4596678)
Supplement: 10.1534_115.178962_genetics.115.178962-1.pdf [file 10.1534_115.178962_genetics.115.178962-1.pdf]

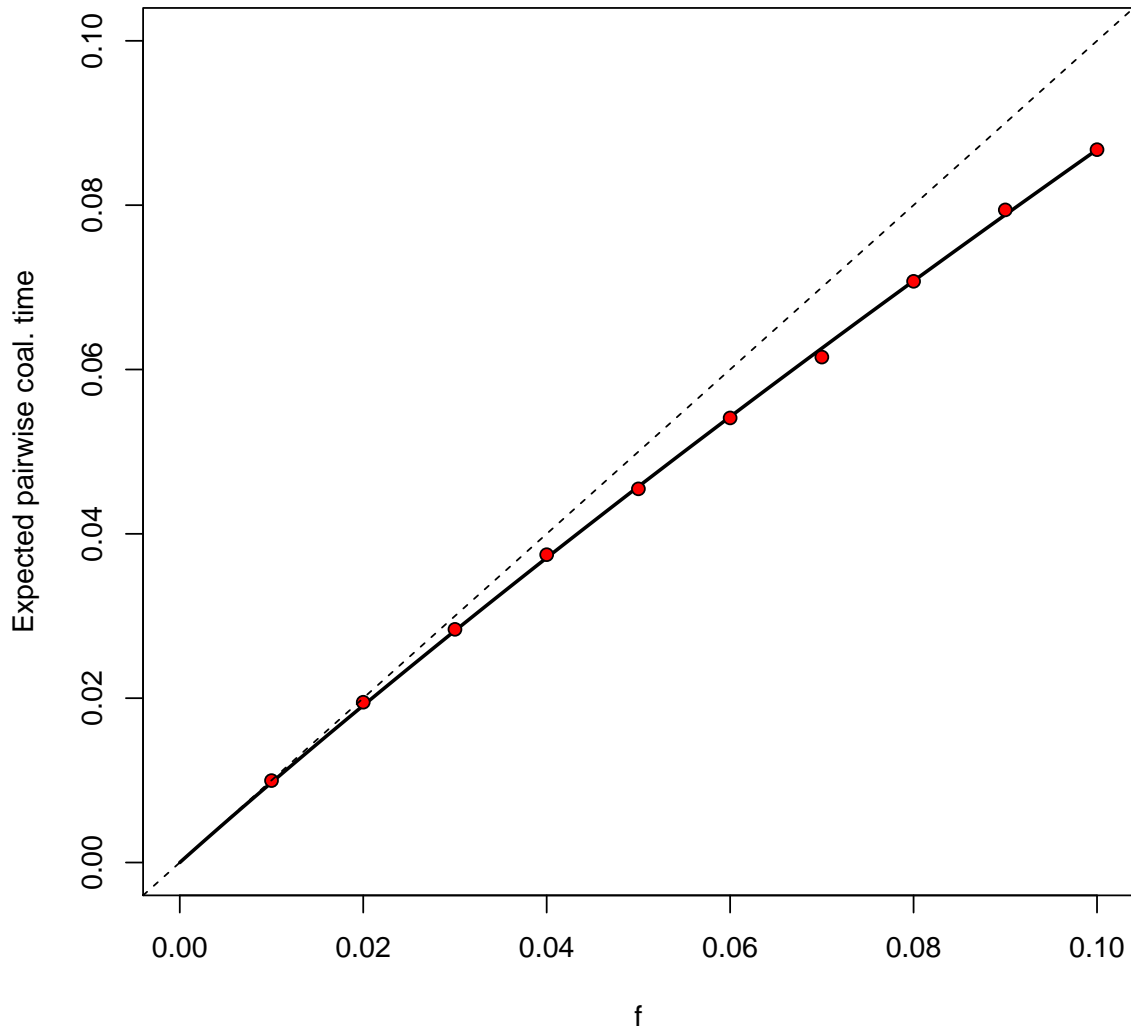

Figure S1: The expected pairwise coalescent time, in units of  $2N$  generation, on the background of a derived neutral allele with frequency  $f$  in the population. The dashed  $x = y$  line shows our approximation  $\mathbb{E}[T_2] = 2Nf$ . The red dots show the mean of our pairwise coalescent simulations featuring an explicit stochastic trajectories. The solid line shows the analytical expectation from GRIFFITHS (2003), equation 93,  $\mathbb{E}[T_2] = \int_0^1 x/(f(x + (1-x)f))(2-f + 2(1-f)\log(1-f)/f)dx$ .

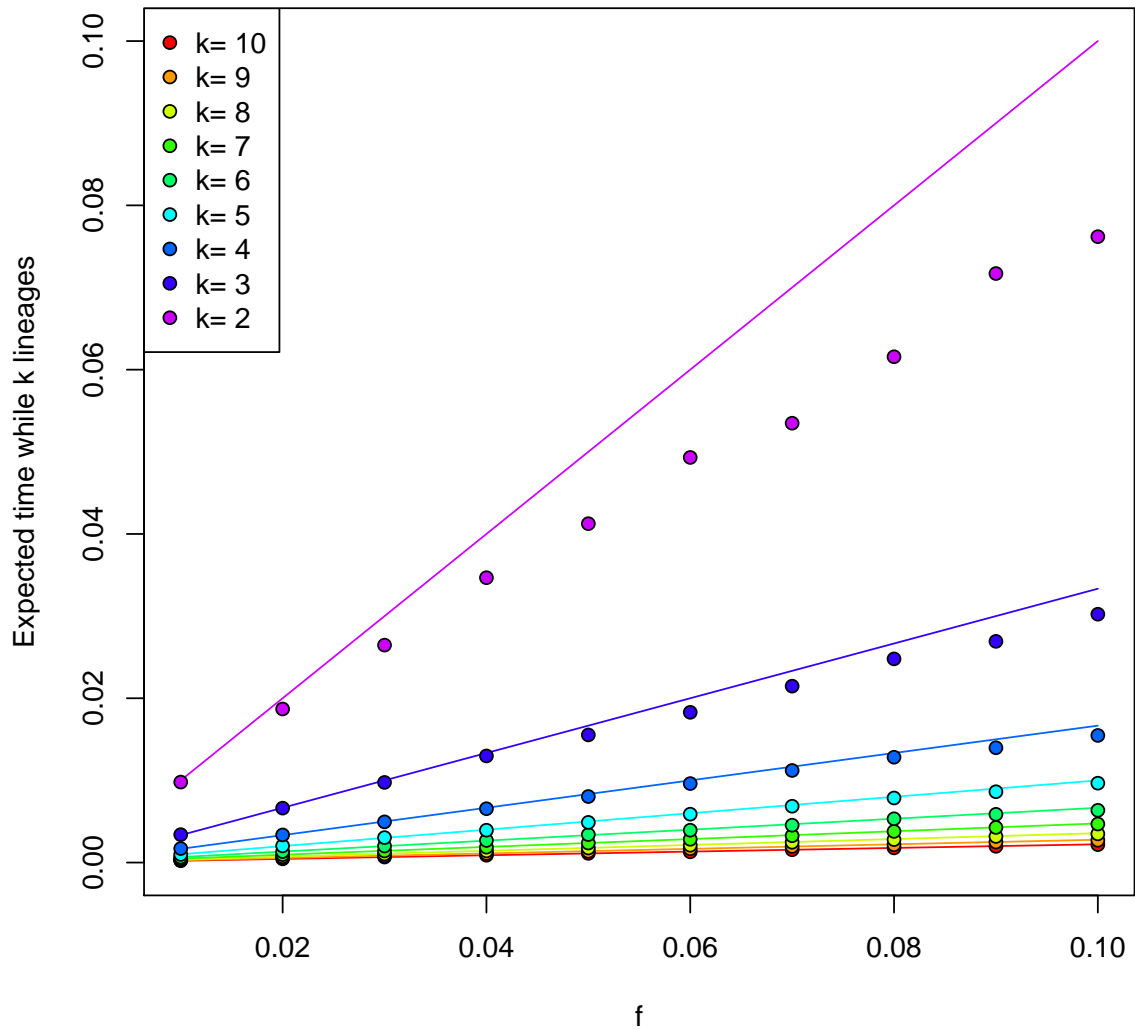

Figure S2: Expected inter-coalescent time intervals for 10 lineages sampled in the current day on the background of a derived neutral allele with frequency  $f$  in the population. The colored dots give means of  $T_k$  from our simulations using stochastic trajectories. The solid lines show the expected coalescent times under our approximation  $\mathbb{E}[T_k] = 2Nf/\binom{k}{2}$ . Note the good agreement except for  $k = 2$ . Presumably our approximation over estimates this time as it fails to acknowledge that the allele is derived, and hence is decreasing in frequency backward in time.

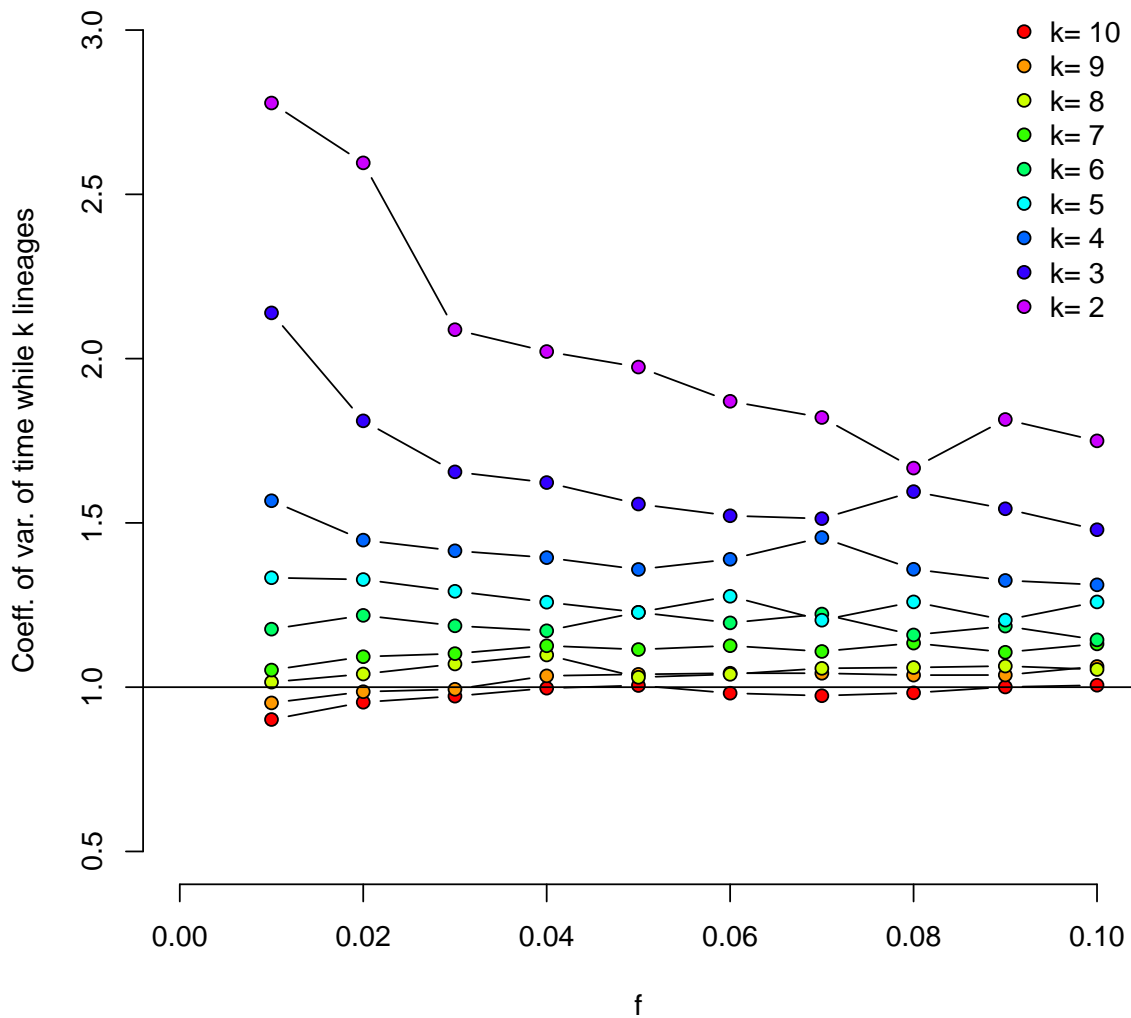

Figure S3: The coefficient of variation (CV) of the inter-coalescent time intervals for 10 lineages sampled in the current day on the background of a derived neutral allele with frequency  $f$  in the population. The colored dots give the CVs of  $T_k$  from our simulations using stochastic trajectories. Under our approximation the coalescent time intervals are exponential, and so have  $CV=1$ . The deeper coalescent time-intervals (low  $k$ s) are more variable than our predictions presumably because neutral trajectories are highly variable so increasing the variance of the coalescent times. More recent time-intervals (high  $k$ ) are in better agreement with our approximation, as the trajectory with not have strayed far from a frequency  $f$  a short way back in time.

**File S1**

**Simulation Code**

**Available for download at [www.genetics.org/lookup/suppl/doi:10.1534/genetics.115.178962/-/DC1](http://www.genetics.org/lookup/suppl/doi:10.1534/genetics.115.178962/-/DC1)**
