# Supplementary material
Source: PubMed Central journal article supplement (PMC4596678)
Supplement: 10.1534_115.178962_genetics.115.178962-2.pdf [file 10.1534_115.178962_genetics.115.178962-2.pdf]

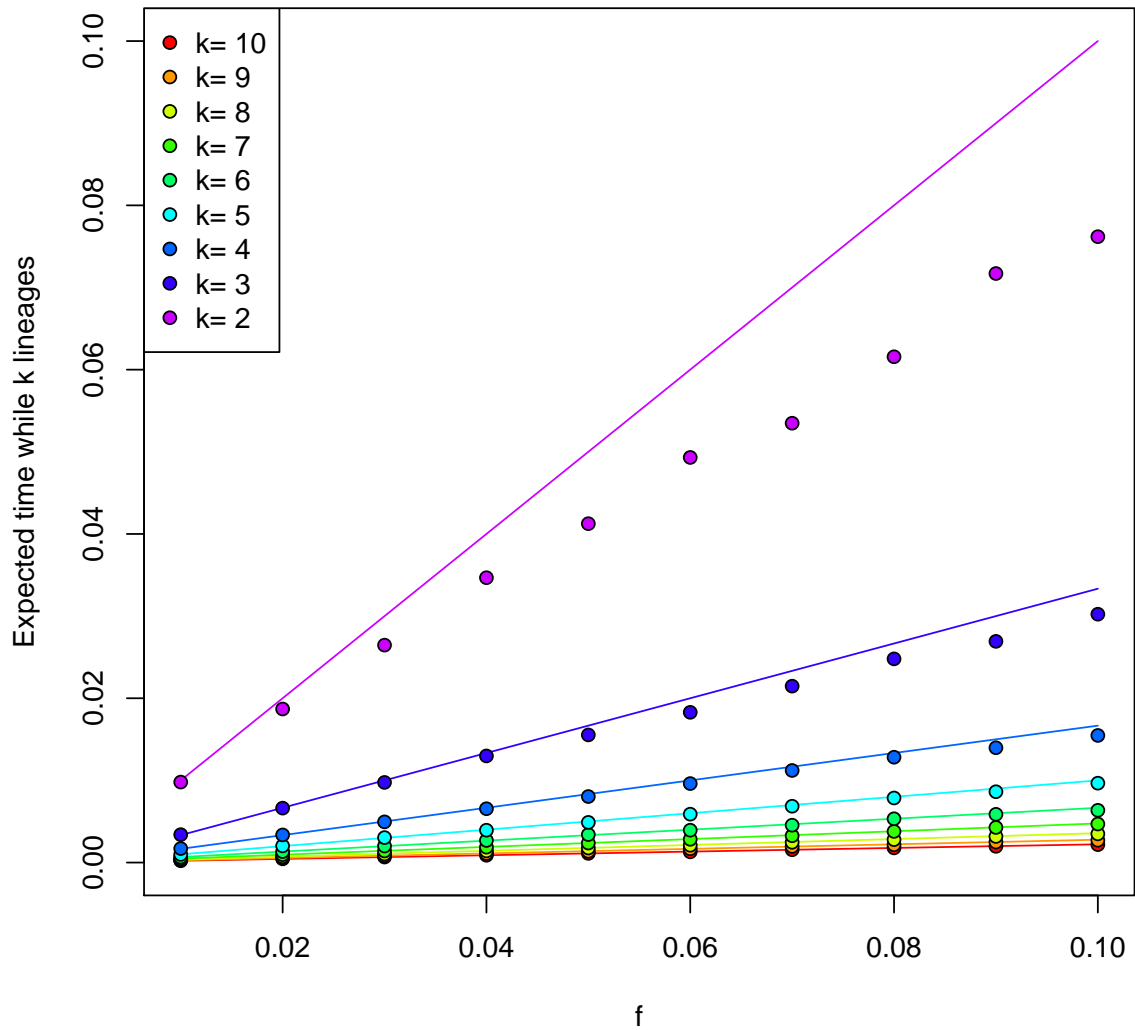

Figure S2: Expected inter-coalescent time intervals for 10 lineages sampled in the current day on the background of a derived neutral allele with frequency  $f$  in the population. The colored dots give means of  $T_k$  from our simulations using stochastic trajectories. The solid lines show the expected coalescent times under our approximation  $\mathbb{E}[T_k] = 2Nf / \binom{k}{2}$ . Note the good agreement except for  $k = 2$ . Presumably our approximation over estimates this time as it fails to acknowledge that the allele is derived, and hence is decreasing in frequency backward in time.
