# Supplementary material
Source: PubMed Central journal article supplement (PMC4596678)
Supplement: 10.1534_115.178962_genetics.115.178962-4.pdf [file 10.1534_115.178962_genetics.115.178962-4.pdf]

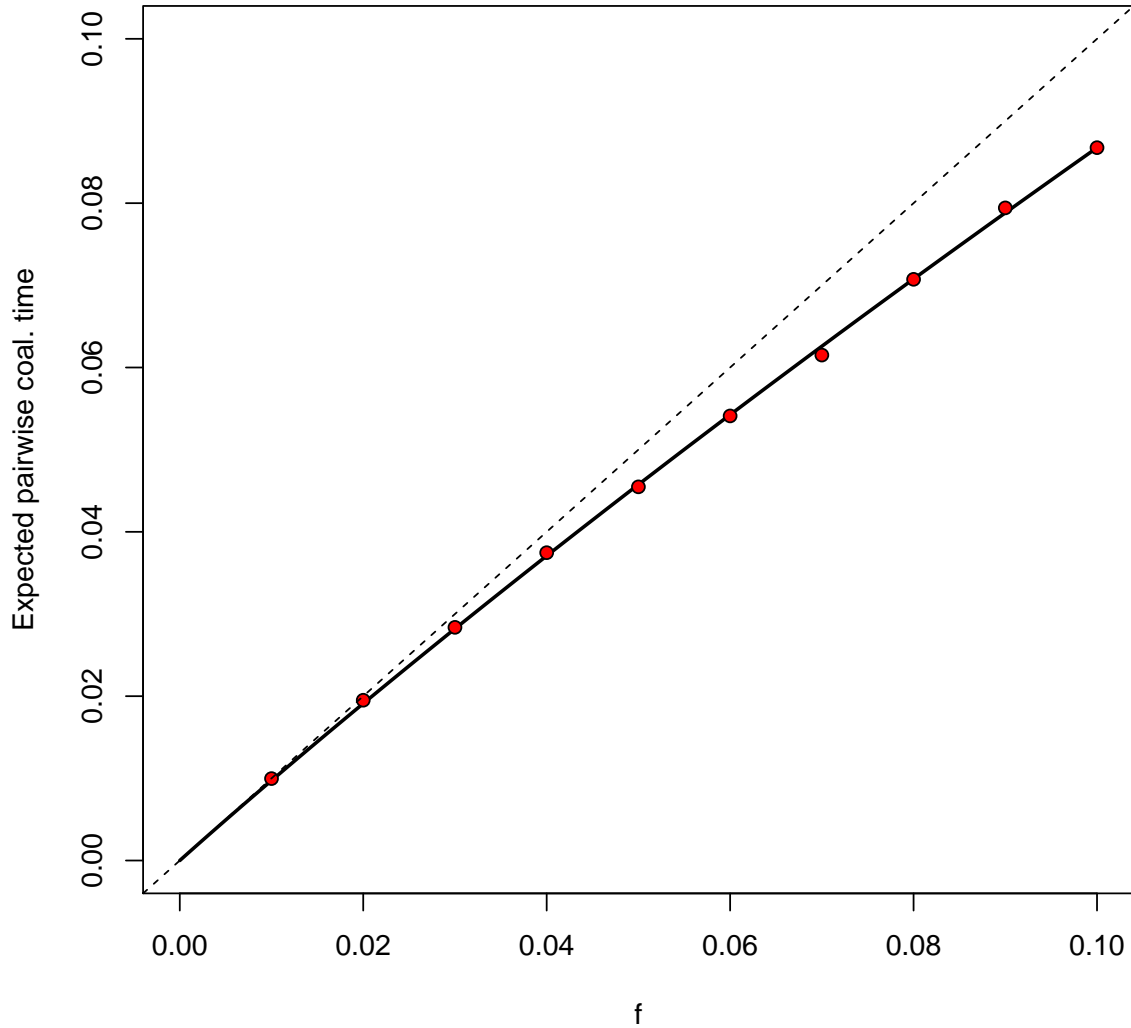

Figure S1: The expected pairwise coalescent time, in units of  $2N$  generation, on the background of a derived neutral allele with frequency  $f$  in the population. The dashed  $x = y$  line shows our approximation  $\mathbb{E}[T_2] = 2Nf$ . The red dots show the mean of our pairwise coalescent simulations featuring an explicit stochastic trajectories. The solid line shows the analytical expectation from GRIFFITHS (2003), equation 93,  $\mathbb{E}[T_2] = \int_0^1 x/(f(x + (1-x)f))(2-f + 2(1-f)\log(1-f)/f)dx$ .
