# Supplementary material
Source: PubMed Central journal article supplement (PMC4596678)
Supplement: 10.1534_115.178962_genetics.115.178962-5.pdf [file 10.1534_115.178962_genetics.115.178962-5.pdf]

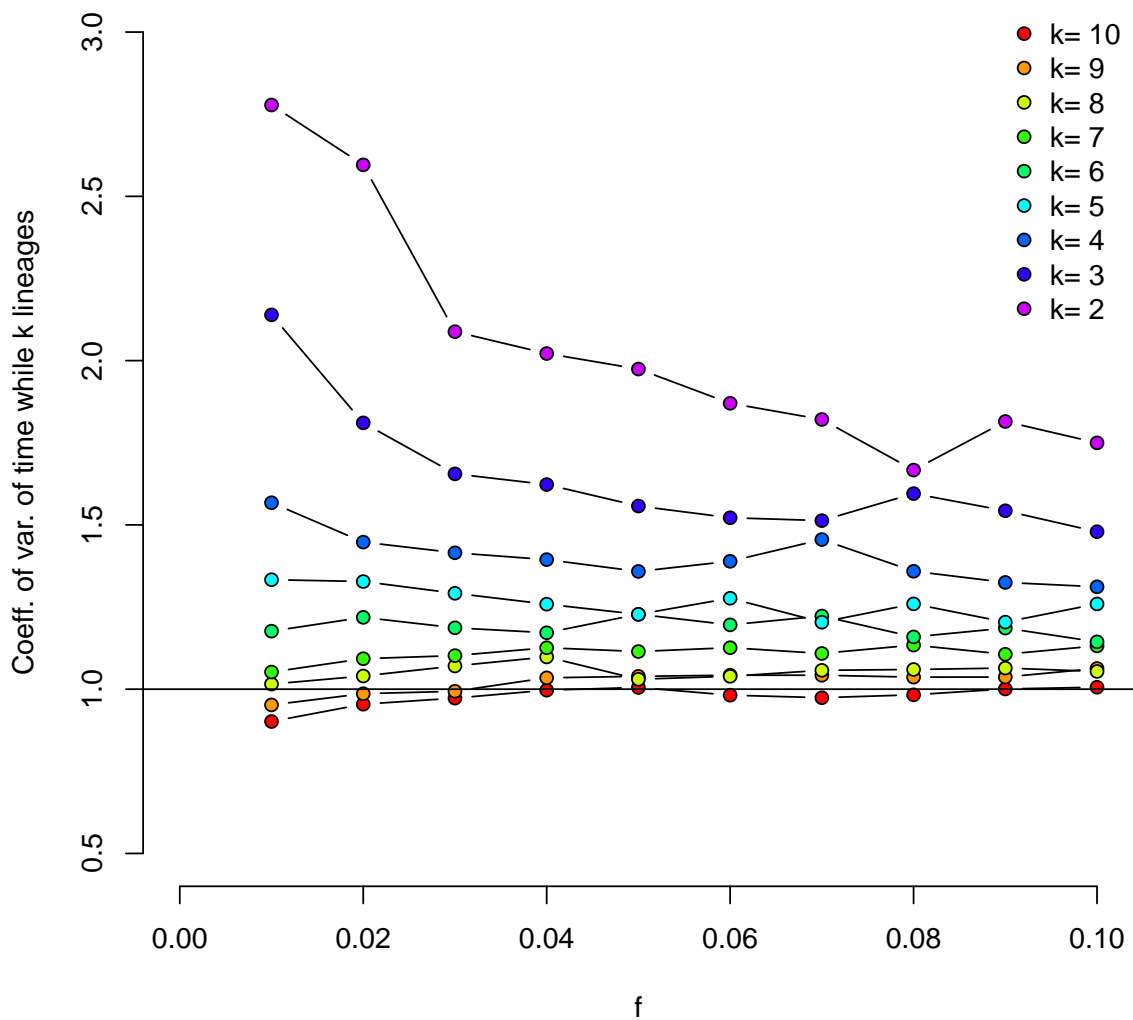

Figure S3: The coefficient of variation (CV) of the inter-coalescent time intervals for 10 lineages sampled in the current day on the background of a derived neutral allele with frequency  $f$  in the population. The colored dots give the CVs of  $T_k$  from our simulations using stochastic trajectories. Under our approximation the coalescent time intervals are exponential, and so have  $CV=1$ . The deeper coalescent time-intervals (low  $k$ s) are more variable than our predictions presumably because neutral trajectories are highly variable so increasing the variance of the coalescent times. More recent time-intervals (high  $k$ ) are in better agreement with our approximation, as the trajectory with not have strayed far from a frequency  $f$  a short way back in time.
